# Supplementary material for: Design and synthesis of 1,8-naphthalimide functionalized benzothiadiazoles
Source: Royal Society of Chemistry journal article supplement (doi:10.1039/d1nj00919b), 2021-01-01
Supplement: d1nj00919b1.pdf [file d1nj00919b1.pdf]

## Electronic Supplemental Information

### Design and Synthesis of 1,8-Naphthalimide Functionalized Benzothiadiazoles

Yogajivan Rout,<sup>a</sup> Rajneesh Misra<sup>a\*</sup>

<sup>a</sup>Department of Chemistry, Indian Institute of Technology, Indore 453552, India. E-mail:  
[rajneeshmisra@iiti.ac.in](mailto:rajneeshmisra@iiti.ac.in)

## Table of Contents

|                                                                                                 |            |
|-------------------------------------------------------------------------------------------------|------------|
| <b>I.</b> Copies of $^1\text{H}$ NMR, $^{13}\text{C}$ NMR spectra, HRMS for <b>BTD2-5</b> ..... | <b>S3</b>  |
| <b>II.</b> Theoretical calculations for <b>BTD2-5</b> .....                                     | <b>S15</b> |
| <b>III.</b> Fluorescence spectra of <b>BTD1-5</b> in DCM.....                                   | <b>S15</b> |

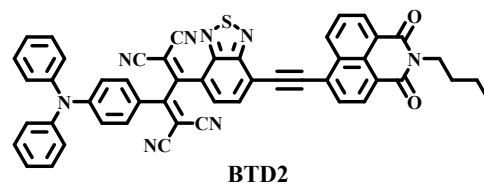

RM-YR-122A.001.001.1r.esp

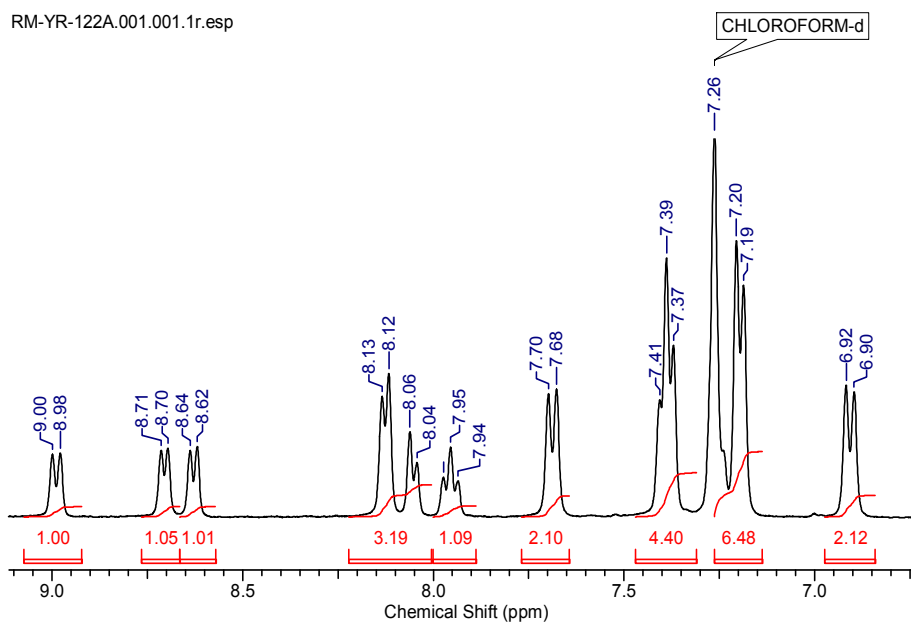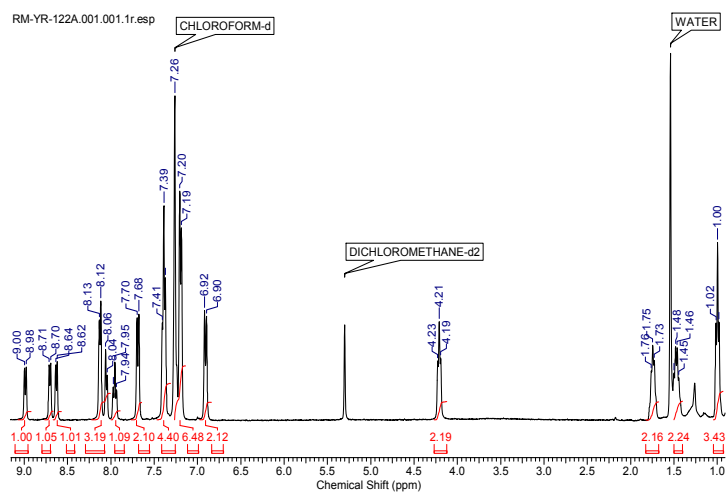

**Figure S1.**  $^1\text{H}$  NMR spectra of **BTD2** in  $\text{CDCl}_3$  (400 MHz, 25 °C).

RM-YR-153-127.001.001.1r.esp

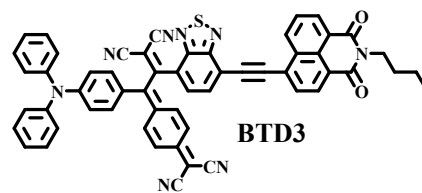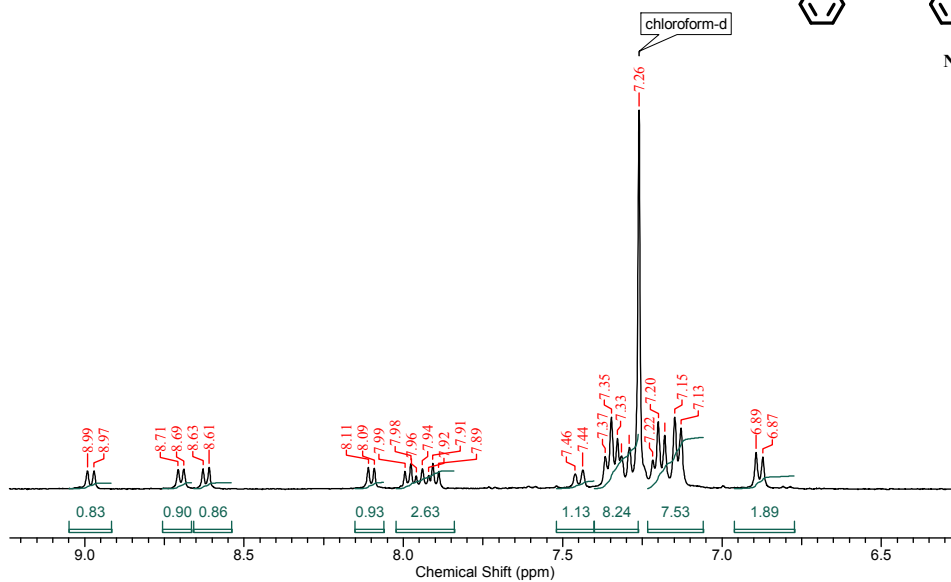

RM-YR-153-127.001.001.1r.esp

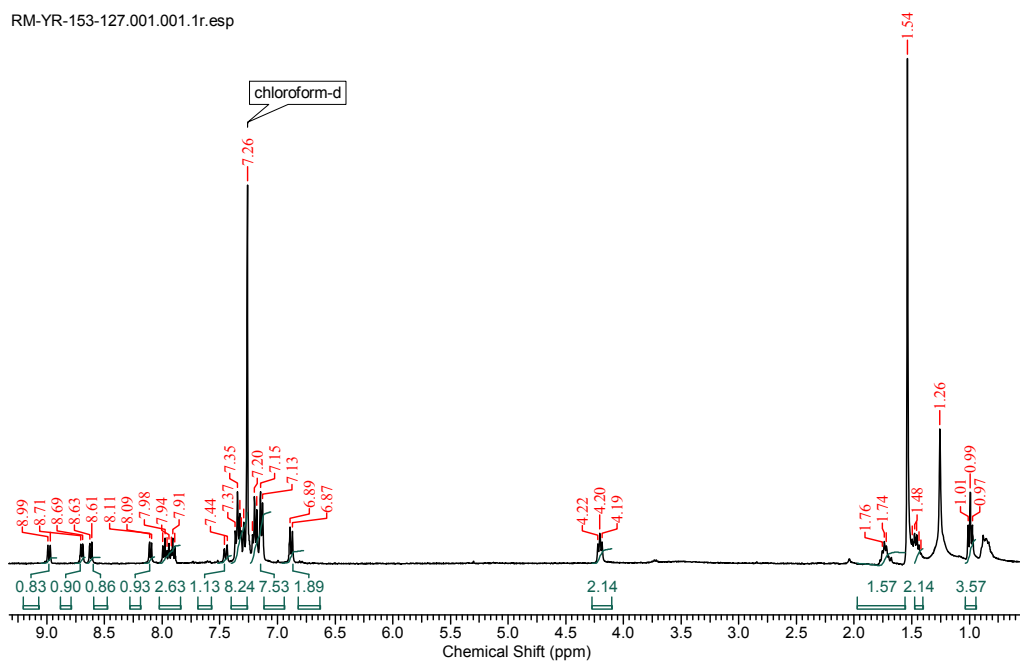

Figure S2. <sup>1</sup>H NMR spectra of BTD3 in CDCl<sub>3</sub> (400 MHz, 25 °C).

RM-YR-550.001.001.1r.esp

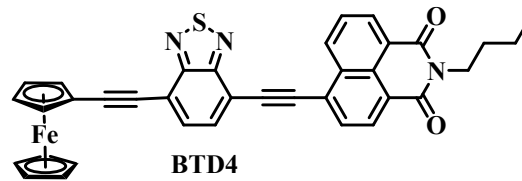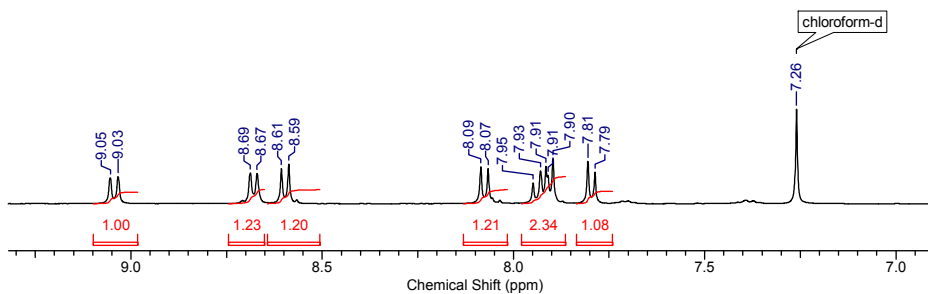

RM-YR-550.001.001.1r.esp

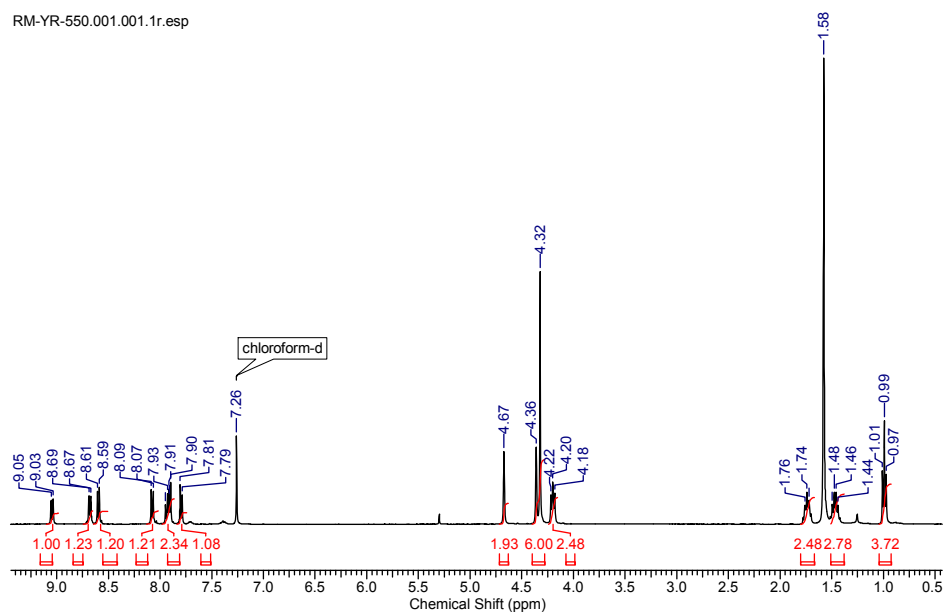

**Figure S3.** <sup>1</sup>H NMR spectra of **BTD4** in CDCl<sub>3</sub> (400 MHz, 25 °C).

RM-MP-450\_002001R (3).ESP

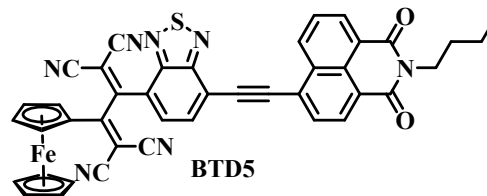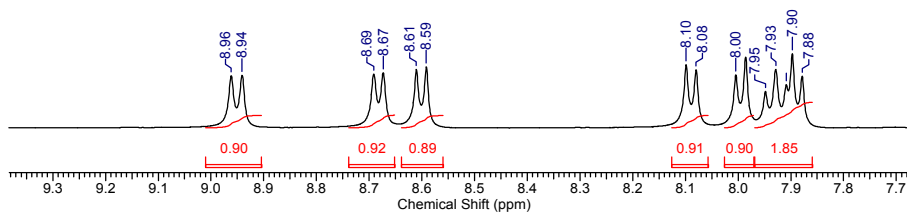

RM-MP-450\_002001R (3).ESP

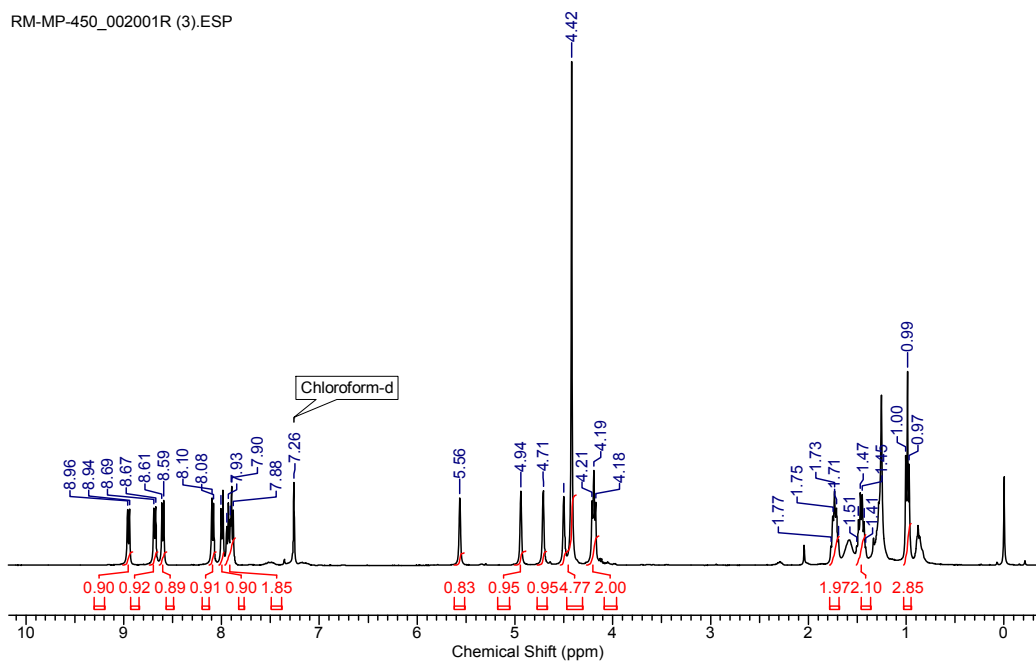

Figure S4. <sup>1</sup>H NMR spectra of BTD5 in CDCl<sub>3</sub> (400 MHz, 25 °C).

RM-YR-122B.003.001.1r.esp

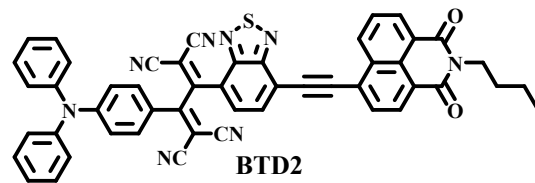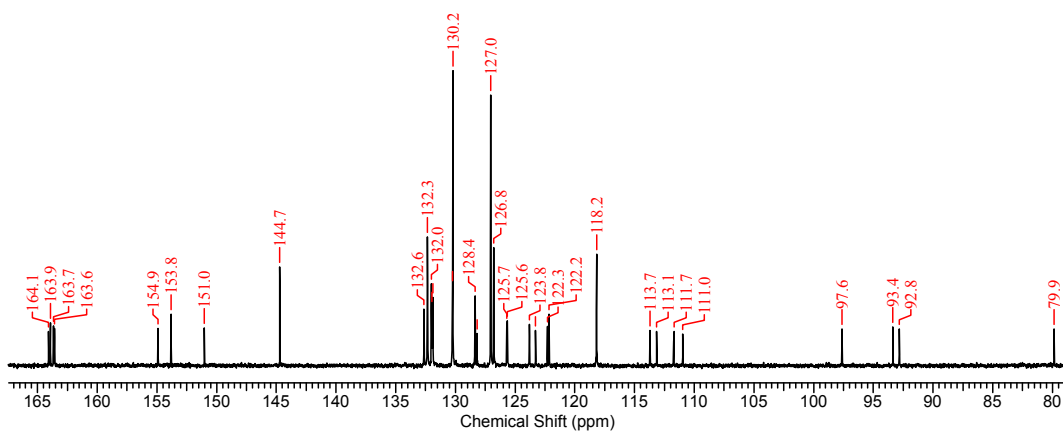

RM-YR-122B.003.001.1r.esp

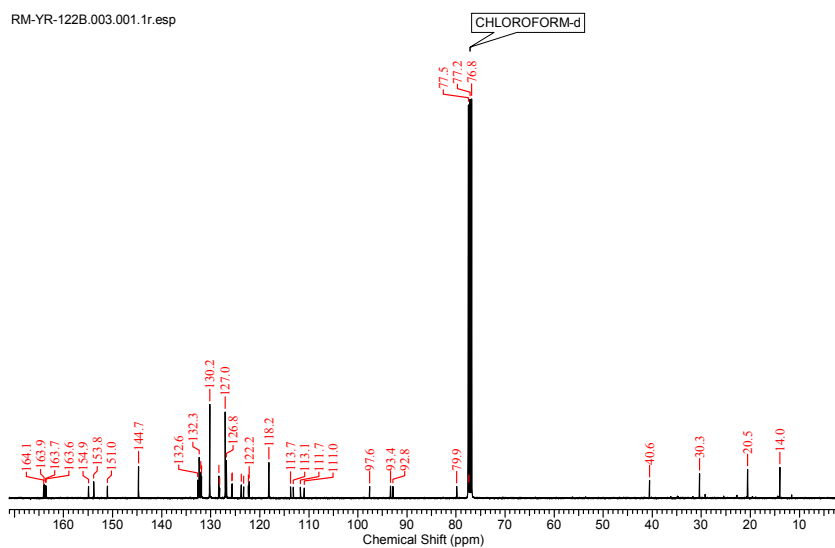

**Figure S5.** <sup>13</sup>C NMR spectra of **BTD2** in CDCl<sub>3</sub> (100 MHz, 25 °C).

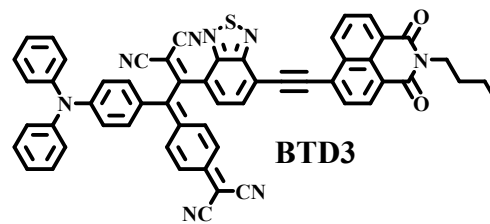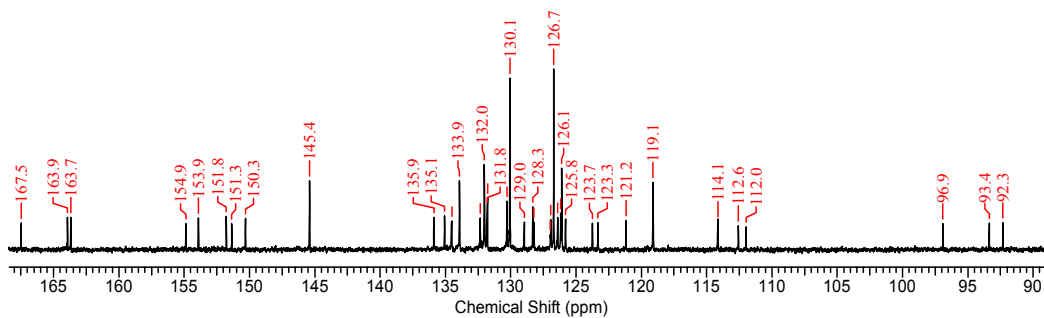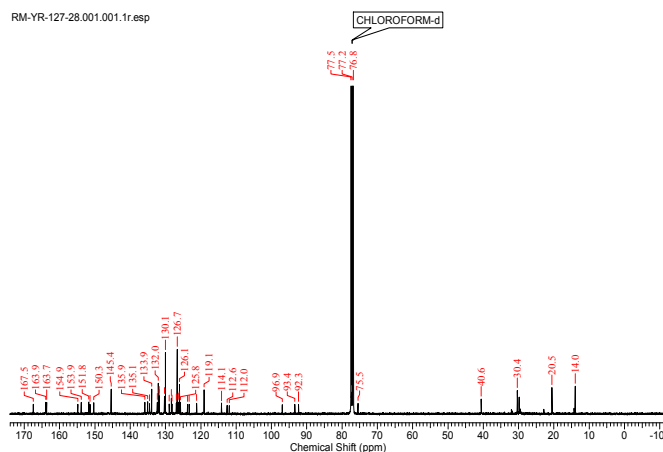

Figure S6. <sup>13</sup>C NMR spectra of BTD3 in CDCl<sub>3</sub> (100 MHz, 25 °C).



RM-YR-550A.001.001.1r.esp

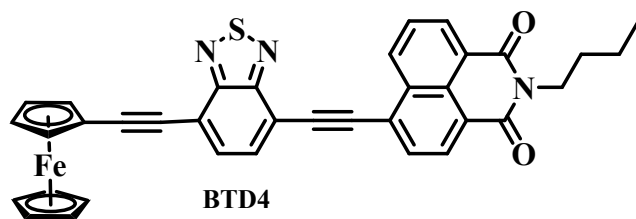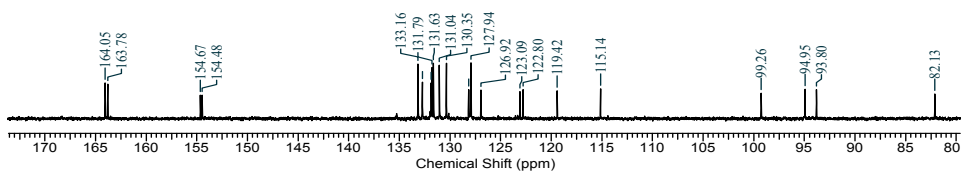

RM-YR-550A.001.001.1r.esp

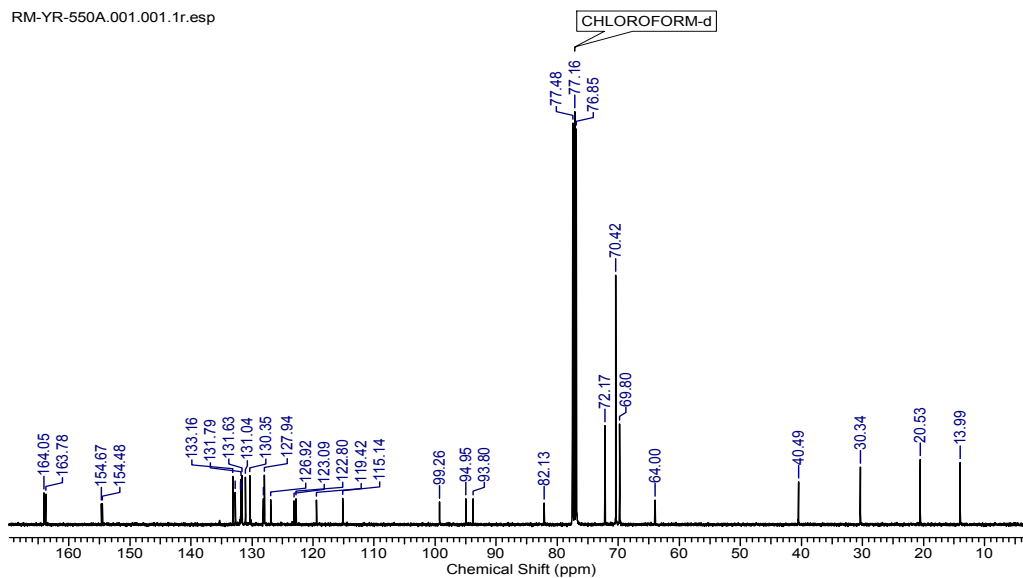

Figure S7. <sup>13</sup>C NMR spectra of BTD4 in CDCl<sub>3</sub> (100 MHz, 25 °C).

RM-YR-553.001.001.1r.esp

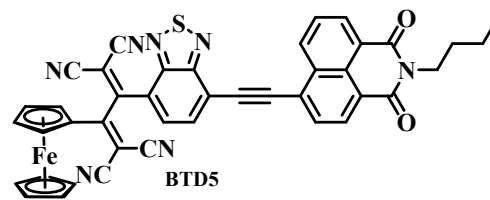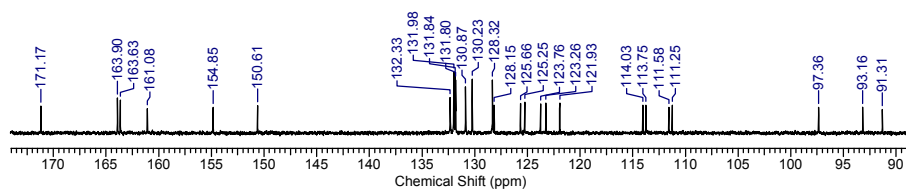

RM-YR-553.001.001.1r.esp

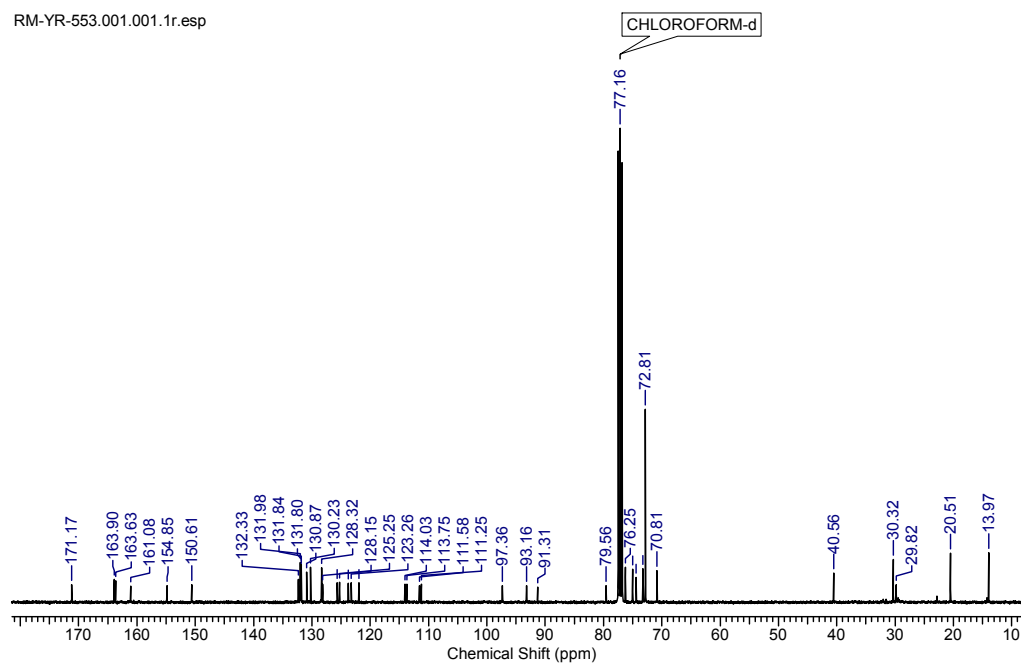

**Figure S8.** <sup>13</sup>C NMR spectra of **BTD5** in CDCl<sub>3</sub> (100 MHz, 25 °C).

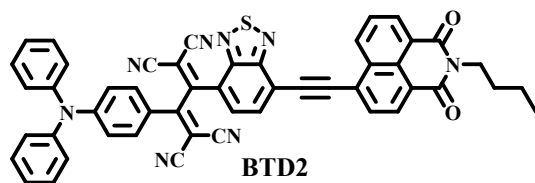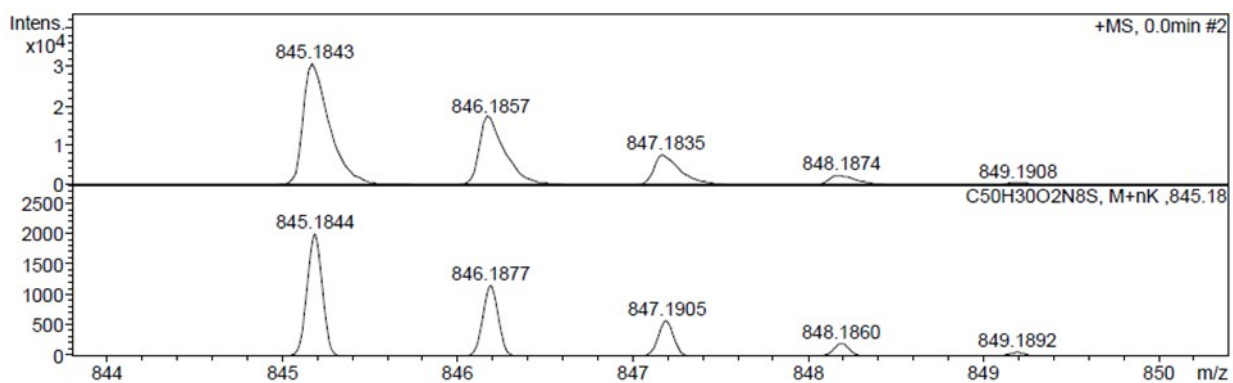

**Figure S9.** HRMS spectra of **BTD2**.

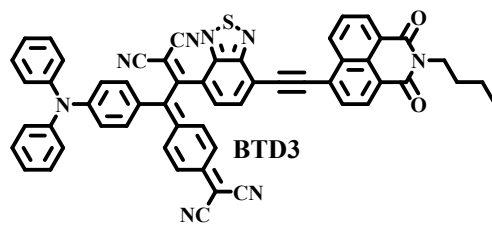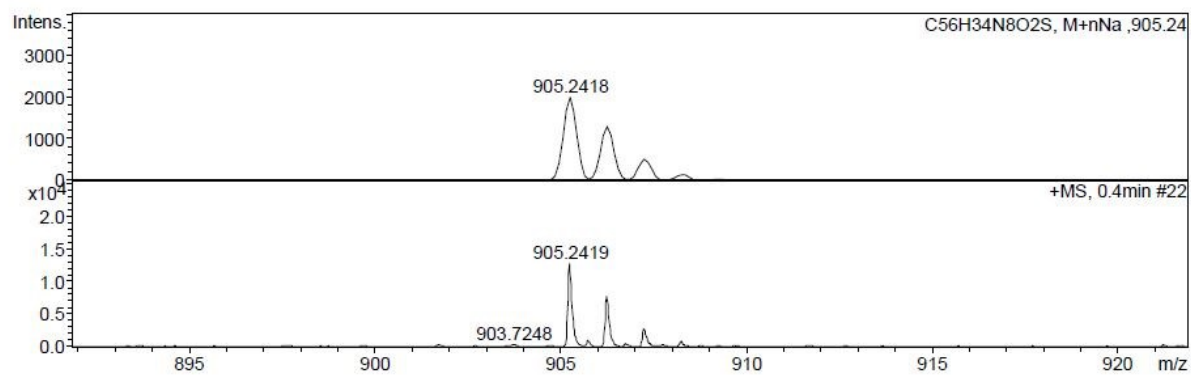

Figure S10. HRMS spectra of BTD3.

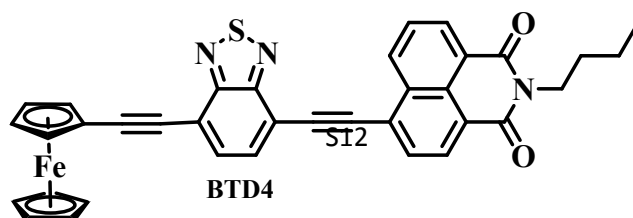

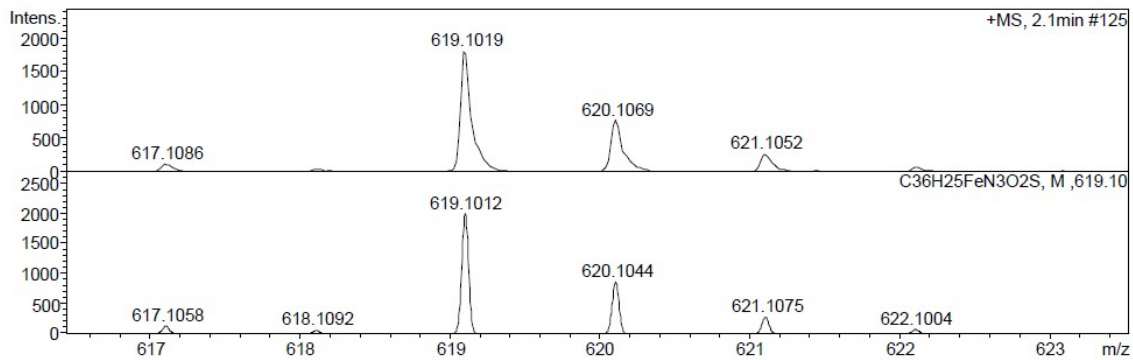

**Figure S11.** HRMS spectra of **BTD4**.

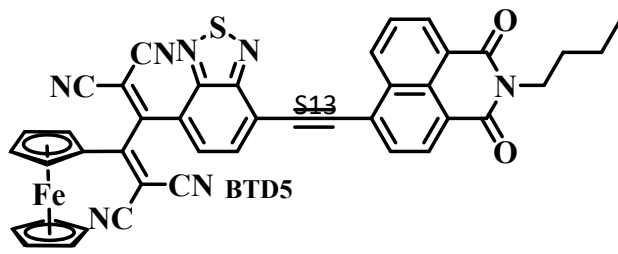

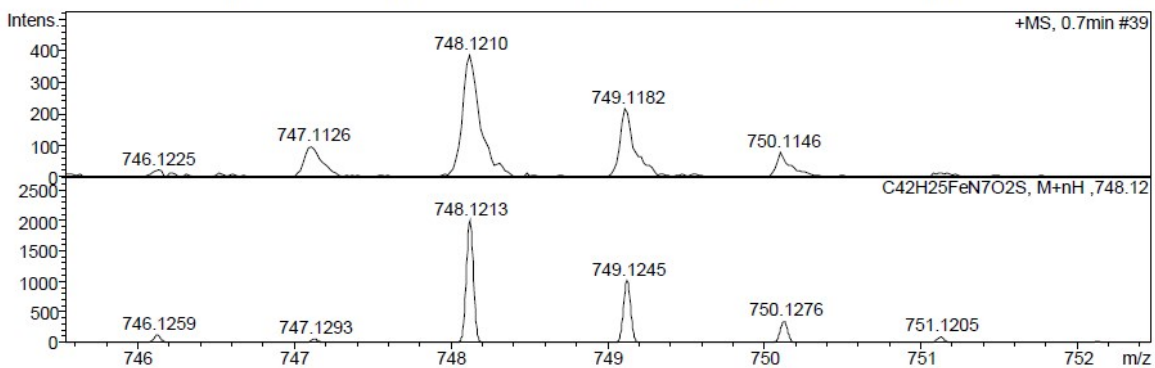

**Figure S12.** HRMS spectra of **BTD5**.

## DFT calculation

### BTD2

Input orientation:

| Center<br>Number | Atomic<br>Number | Atomic<br>Type | Coordinates (Angstroms) |           |           |
|------------------|------------------|----------------|-------------------------|-----------|-----------|
|                  |                  |                | X                       | Y         | Z         |
| 1                | 6                | 0              | -7.001003               | -1.358137 | 0.288294  |
| 2                | 6                | 0              | -8.142798               | -1.301075 | -0.505102 |
| 3                | 6                | 0              | -7.127969               | -1.392740 | 1.674586  |
| 4                | 6                | 0              | -9.397521               | -1.279340 | 0.084232  |
| 5                | 6                | 0              | -8.384888               | -1.353920 | 2.257572  |
| 6                | 1                | 0              | -6.239298               | -1.446535 | 2.291274  |
| 7                | 6                | 0              | -9.523984               | -1.300283 | 1.465967  |
| 8                | 1                | 0              | -10.280691              | -1.235958 | -0.541580 |
| 9                | 1                | 0              | -8.473384               | -1.378120 | 3.336931  |
| 10               | 1                | 0              | -10.504966              | -1.276778 | 1.924012  |
| 11               | 6                | 0              | -5.490067               | -2.379425 | -1.337992 |
| 12               | 6                | 0              | -5.842457               | -3.707925 | -1.118279 |
| 13               | 6                | 0              | -4.944359               | -2.008286 | -2.564525 |
| 14               | 6                | 0              | -5.649647               | -4.652051 | -2.114968 |
| 15               | 6                | 0              | -4.739456               | -2.960265 | -3.550830 |
| 16               | 1                | 0              | -4.683474               | -0.971847 | -2.739573 |
| 17               | 6                | 0              | -5.093211               | -4.284661 | -3.332005 |
| 18               | 1                | 0              | -5.929203               | -5.683013 | -1.934690 |
| 19               | 1                | 0              | -4.314677               | -2.661416 | -4.501583 |
| 20               | 1                | 0              | -4.939760               | -5.025029 | -4.107270 |
| 21               | 6                | 0              | -4.698251               | -0.537398 | 0.076118  |
| 22               | 6                | 0              | -3.347914               | -0.890240 | -0.066474 |
| 23               | 6                | 0              | -4.994332               | 0.706417  | 0.650016  |
| 24               | 6                | 0              | -2.347394               | -0.035191 | 0.340528  |
| 25               | 1                | 0              | -3.089128               | -1.852143 | -0.486885 |
| 26               | 6                | 0              | -3.985926               | 1.560115  | 1.044085  |
| 27               | 1                | 0              | -6.025011               | 0.997173  | 0.798086  |
| 28               | 6                | 0              | -2.635523               | 1.223731  | 0.882882  |
| 29               | 1                | 0              | -1.319681               | -0.353478 | 0.223629  |
| 30               | 1                | 0              | -4.248789               | 2.494698  | 1.522559  |
| 31               | 7                | 0              | -5.712525               | -1.405629 | -0.321748 |
| 32               | 6                | 0              | -0.466695               | 1.463384  | 2.105764  |
| 33               | 6                | 0              | 6.369469                | -1.144736 | -2.033136 |
| 34               | 6                | 0              | 6.831731                | -2.466191 | -1.739061 |
| 35               | 6                | 0              | 7.055940                | -0.358299 | -2.936751 |
| 36               | 6                | 0              | 6.181446                | -3.324739 | -0.822800 |
| 37               | 6                | 0              | 7.993952                | -2.930686 | -2.397367 |
| 38               | 6                | 0              | 8.206728                | -0.835010 | -3.575967 |

|    |   |   |           |           |           |
|----|---|---|-----------|-----------|-----------|
| 39 | 1 | 0 | 6.696198  | 0.639935  | -3.148838 |
| 40 | 6 | 0 | 6.671232  | -4.580370 | -0.579264 |
| 41 | 1 | 0 | 5.290808  | -2.975660 | -0.313930 |
| 42 | 6 | 0 | 8.478120  | -4.229265 | -2.128601 |
| 43 | 6 | 0 | 8.670733  | -2.098870 | -3.314510 |
| 44 | 1 | 0 | 8.747672  | -0.219474 | -4.282847 |
| 45 | 6 | 0 | 7.826988  | -5.038618 | -1.234157 |
| 46 | 1 | 0 | 6.165997  | -5.228578 | 0.125655  |
| 47 | 1 | 0 | 8.223802  | -6.028420 | -1.048381 |
| 48 | 6 | 0 | 9.892274  | -2.578379 | -4.007719 |
| 49 | 6 | 0 | 9.695370  | -4.733187 | -2.809632 |
| 50 | 8 | 0 | 10.146880 | -5.835002 | -2.593336 |
| 51 | 8 | 0 | 10.503970 | -1.881746 | -4.786368 |
| 52 | 7 | 0 | 10.308598 | -3.877389 | -3.726078 |
| 53 | 6 | 0 | 11.512086 | -4.367490 | -4.411248 |
| 54 | 1 | 0 | 11.534381 | -3.893588 | -5.390685 |
| 55 | 1 | 0 | 11.393314 | -5.442738 | -4.529489 |
| 56 | 6 | 0 | 12.788959 | -4.055375 | -3.640826 |
| 57 | 1 | 0 | 12.727084 | -4.513374 | -2.649143 |
| 58 | 1 | 0 | 12.863650 | -2.973027 | -3.499360 |
| 59 | 6 | 0 | 14.031177 | -4.564939 | -4.364969 |
| 60 | 1 | 0 | 14.078680 | -4.114579 | -5.362188 |
| 61 | 1 | 0 | 13.942178 | -5.645619 | -4.519208 |
| 62 | 6 | 0 | 15.319652 | -4.263013 | -3.607653 |
| 63 | 1 | 0 | 15.312088 | -4.728193 | -2.618614 |
| 64 | 1 | 0 | 16.194492 | -4.636027 | -4.143951 |
| 65 | 1 | 0 | 15.449513 | -3.186951 | -3.466477 |
| 66 | 1 | 0 | -8.040814 | -1.278850 | -1.582952 |
| 67 | 1 | 0 | -6.272414 | -3.993303 | -0.166324 |
| 68 | 6 | 0 | -1.574393 | 2.126659  | 1.346874  |
| 69 | 6 | 0 | -0.582527 | 1.318280  | 3.444381  |
| 70 | 6 | 0 | 0.463500  | 0.820848  | 4.284714  |
| 71 | 6 | 0 | -1.768318 | 1.748748  | 4.123563  |
| 72 | 7 | 0 | 1.303339  | 0.477456  | 4.987323  |
| 73 | 7 | 0 | -2.718580 | 2.087672  | 4.671131  |
| 74 | 6 | 0 | -1.561274 | 3.481183  | 1.160036  |
| 75 | 6 | 0 | -0.601568 | 4.341575  | 1.828677  |
| 76 | 6 | 0 | -2.479079 | 4.146275  | 0.253020  |
| 77 | 6 | 0 | -0.591231 | 5.673951  | 1.657720  |
| 78 | 1 | 0 | 0.109768  | 3.897268  | 2.512883  |
| 79 | 6 | 0 | -2.462946 | 5.476786  | 0.067474  |
| 80 | 1 | 0 | -3.164626 | 3.540098  | -0.321740 |
| 81 | 1 | 0 | 0.123000  | 6.286238  | 2.193350  |
| 82 | 1 | 0 | -3.143463 | 5.935549  | -0.638510 |
| 83 | 6 | 0 | -1.529694 | 6.325484  | 0.772052  |
| 84 | 6 | 0 | -1.518084 | 7.686921  | 0.591241  |
| 85 | 6 | 0 | -2.440454 | 8.327620  | -0.284061 |
| 86 | 7 | 0 | -3.192075 | 8.825167  | -0.997908 |
| 87 | 6 | 0 | -0.579075 | 8.519315  | 1.264126  |
| 88 | 7 | 0 | 0.189482  | 9.174307  | 1.813966  |
| 89 | 6 | 0 | 5.203902  | -0.646634 | -1.389923 |
| 90 | 6 | 0 | 4.215531  | -0.258273 | -0.825800 |



|     |    |   |          |           |           |
|-----|----|---|----------|-----------|-----------|
| 91  | 6  | 0 | 3.052950 | 0.154904  | -0.133259 |
| 92  | 6  | 0 | 2.430545 | -0.725996 | 0.811084  |
| 93  | 6  | 0 | 2.457078 | 1.374929  | -0.326288 |
| 94  | 6  | 0 | 1.262067 | -0.315059 | 1.538283  |
| 95  | 6  | 0 | 1.296899 | 1.772514  | 0.384122  |
| 96  | 1  | 0 | 2.888255 | 2.063252  | -1.040982 |
| 97  | 6  | 0 | 0.702148 | 0.990089  | 1.340043  |
| 98  | 1  | 0 | 0.888190 | 2.751413  | 0.171253  |
| 99  | 7  | 0 | 2.813029 | -1.963933 | 1.092411  |
| 100 | 7  | 0 | 0.781764 | -1.268066 | 2.325952  |
| 101 | 16 | 0 | 1.759110 | -2.549411 | 2.176949  |

-----  
HF=-3140.1639741 Hartree

### BTD3

Input orientation:

| Center<br>Number | Atomic<br>Number | Atomic<br>Type | Coordinates (Angstroms) |           |           |
|------------------|------------------|----------------|-------------------------|-----------|-----------|
|                  |                  |                | X                       | Y         | Z         |
| 1                | 6                | 0              | 6.195232                | -1.038653 | -1.812023 |
| 2                | 6                | 0              | 6.631525                | -2.368256 | -1.515097 |
| 3                | 6                | 0              | 6.896690                | -0.268401 | -2.718178 |
| 4                | 6                | 0              | 5.965055                | -3.210731 | -0.595471 |
| 5                | 6                | 0              | 7.783288                | -2.857837 | -2.173693 |
| 6                | 6                | 0              | 8.036495                | -0.769830 | -3.357802 |
| 7                | 1                | 0              | 6.556358                | 0.736135  | -2.932496 |
| 8                | 6                | 0              | 6.429595                | -4.475425 | -0.349178 |
| 9                | 1                | 0              | 5.082381                | -2.842301 | -0.086256 |
| 10               | 6                | 0              | 8.241427                | -4.165202 | -1.901851 |
| 11               | 6                | 0              | 8.475261                | -2.042317 | -3.094172 |
| 12               | 1                | 0              | 8.588533                | -0.167367 | -4.067371 |
| 13               | 6                | 0              | 7.574934                | -4.958664 | -1.004283 |
| 14               | 1                | 0              | 5.911750                | -5.111363 | 0.357708  |
| 15               | 1                | 0              | 7.951479                | -5.955987 | -0.816521 |
| 16               | 6                | 0              | 9.684381                | -2.548603 | -3.789097 |
| 17               | 6                | 0              | 9.446644                | -4.695499 | -2.583459 |
| 18               | 8                | 0              | 9.877597                | -5.805142 | -2.364718 |
| 19               | 8                | 0              | 10.308818               | -1.867380 | -4.571714 |
| 20               | 7                | 0              | 10.074326               | -3.855217 | -3.505024 |
| 21               | 6                | 0              | 11.263421               | -4.372905 | -4.194400 |
| 22               | 1                | 0              | 11.289557               | -3.904524 | -5.176443 |
| 23               | 1                | 0              | 11.122195               | -5.446123 | -4.306220 |
| 24               | 6                | 0              | 12.551352               | -4.083183 | -3.433710 |

|    |    |   |           |           |           |
|----|----|---|-----------|-----------|-----------|
| 25 | 1  | 0 | 12.486045 | -4.533927 | -2.438929 |
| 26 | 1  | 0 | 12.649701 | -3.001838 | -3.299300 |
| 27 | 6  | 0 | 13.777788 | -4.623277 | -4.162598 |
| 28 | 1  | 0 | 13.827740 | -4.180753 | -5.163231 |
| 29 | 1  | 0 | 13.665258 | -5.702872 | -4.308861 |
| 30 | 6  | 0 | 15.077574 | -4.343218 | -3.416285 |
| 31 | 1  | 0 | 15.067192 | -4.801345 | -2.423986 |
| 32 | 1  | 0 | 15.940741 | -4.738063 | -3.955932 |
| 33 | 1  | 0 | 15.230744 | -3.269144 | -3.283457 |
| 34 | 6  | 0 | 5.039426  | -0.516721 | -1.170380 |
| 35 | 6  | 0 | 4.057803  | -0.109917 | -0.607579 |
| 36 | 6  | 0 | 2.898451  | 0.323118  | 0.078397  |
| 37 | 6  | 0 | 2.238305  | -0.557160 | 0.996380  |
| 38 | 6  | 0 | 2.364956  | 1.578166  | -0.071973 |
| 39 | 6  | 0 | 1.050832  | -0.141399 | 1.686739  |
| 40 | 6  | 0 | 1.208126  | 1.993492  | 0.630742  |
| 41 | 1  | 0 | 2.844751  | 2.276786  | -0.744309 |
| 42 | 6  | 0 | 0.512867  | 1.168865  | 1.477719  |
| 43 | 1  | 0 | 0.860186  | 3.007473  | 0.473670  |
| 44 | 7  | 0 | 2.633160  | -1.779777 | 1.325245  |
| 45 | 7  | 0 | 0.595794  | -1.055584 | 2.531190  |
| 46 | 16 | 0 | 1.583781  | -2.330796 | 2.431261  |
| 47 | 6  | 0 | -0.696926 | 1.644845  | 2.167406  |
| 48 | 6  | 0 | -0.670102 | 3.034563  | 2.729310  |
| 49 | 6  | 0 | -1.825902 | 0.907723  | 2.283944  |
| 50 | 6  | 0 | -1.630059 | 3.993358  | 2.191557  |
| 51 | 6  | 0 | 0.263378  | 3.305061  | 3.684130  |
| 52 | 6  | 0 | -2.021438 | -0.344437 | 1.620213  |
| 53 | 6  | 0 | -2.953324 | 1.368601  | 3.037828  |
| 54 | 6  | 0 | -2.082160 | 3.867104  | 0.869090  |
| 55 | 6  | 0 | -2.161966 | 5.042586  | 2.954777  |
| 56 | 6  | 0 | 1.106540  | 2.278893  | 4.214178  |
| 57 | 6  | 0 | 0.507216  | 4.608462  | 4.214740  |
| 58 | 7  | 0 | -2.242021 | -1.315776 | 1.050366  |
| 59 | 7  | 0 | -3.865839 | 1.708946  | 3.645326  |
| 60 | 6  | 0 | -2.986018 | 4.749324  | 0.325120  |
| 61 | 1  | 0 | -1.722579 | 3.055186  | 0.248507  |
| 62 | 6  | 0 | -3.082730 | 5.916763  | 2.427673  |
| 63 | 1  | 0 | -1.875730 | 5.165405  | 3.989249  |
| 64 | 7  | 0 | 1.790631  | 1.462830  | 4.644999  |
| 65 | 7  | 0 | 0.744899  | 5.643462  | 4.652569  |
| 66 | 6  | 0 | -3.516281 | 5.796023  | 1.097014  |
| 67 | 1  | 0 | -3.311454 | 4.618628  | -0.697156 |
| 68 | 1  | 0 | -3.480667 | 6.705377  | 3.050261  |
| 69 | 7  | 0 | -4.451100 | 6.672321  | 0.568129  |
| 70 | 6  | 0 | -5.368713 | 7.371765  | 1.410311  |
| 71 | 6  | 0 | -4.561117 | 6.872013  | -0.840925 |
| 72 | 6  | 0 | -5.509542 | 8.749714  | 1.284149  |
| 73 | 6  | 0 | -6.144991 | 6.679288  | 2.335555  |
| 74 | 6  | 0 | -5.792413 | 6.722007  | -1.470560 |
| 75 | 6  | 0 | -3.445851 | 7.243405  | -1.586790 |
| 76 | 6  | 0 | -6.419952 | 9.428792  | 2.079175  |

|    |   |   |           |           |           |
|----|---|---|-----------|-----------|-----------|
| 77 | 1 | 0 | -4.906676 | 9.282036  | 0.558998  |
| 78 | 6 | 0 | -7.042101 | 7.366985  | 3.137869  |
| 79 | 1 | 0 | -6.039893 | 5.605025  | 2.426020  |
| 80 | 6 | 0 | -5.904005 | 6.939646  | -2.835288 |
| 81 | 1 | 0 | -6.658389 | 6.439446  | -0.885105 |
| 82 | 6 | 0 | -3.561308 | 7.445145  | -2.953270 |
| 83 | 1 | 0 | -2.492220 | 7.373587  | -1.090003 |
| 84 | 6 | 0 | -7.185107 | 8.741936  | 3.011078  |
| 85 | 1 | 0 | -6.524504 | 10.501886 | 1.974857  |
| 86 | 1 | 0 | -7.640622 | 6.821822  | 3.857487  |
| 87 | 6 | 0 | -4.790044 | 7.296436  | -3.581964 |
| 88 | 1 | 0 | -6.866485 | 6.821520  | -3.318022 |
| 89 | 1 | 0 | -2.688918 | 7.734266  | -3.526774 |
| 90 | 1 | 0 | -7.891607 | 9.275182  | 3.634970  |
| 91 | 1 | 0 | -4.879453 | 7.461798  | -4.648456 |

-----

HF=-2909.2132976 Hartree

## BTD4

Standard orientation:

| Center<br>Number | Atomic<br>Number | Atomic<br>Type | Coordinates (Angstroms) |           |           |
|------------------|------------------|----------------|-------------------------|-----------|-----------|
|                  |                  |                | X                       | Y         | Z         |
| 1                | 6                | 0              | -1.101148               | -1.119110 | -0.688711 |
| 2                | 6                | 0              | -0.429699               | 0.071145  | -0.431212 |
| 3                | 6                | 0              | -2.502045               | -1.188000 | -0.865532 |
| 4                | 6                | 0              | -1.238879               | 1.260912  | -0.352138 |
| 5                | 6                | 0              | -3.326226               | -0.069340 | -0.796268 |
| 6                | 6                | 0              | -2.675855               | 1.190627  | -0.533128 |
| 7                | 1                | 0              | -2.955100               | -2.153653 | -1.063119 |
| 8                | 1                | 0              | -0.524446               | -2.035806 | -0.755708 |
| 9                | 6                | 0              | -4.726239               | -0.144501 | -0.966328 |
| 10               | 6                | 0              | -5.933665               | -0.210640 | -1.110391 |
| 11               | 6                | 0              | -7.335315               | -0.276306 | -1.285905 |
| 12               | 6                | 0              | -8.244368               | 0.843249  | -1.317754 |
| 13               | 6                | 0              | -8.124036               | -1.471893 | -1.456062 |
| 14               | 6                | 0              | -9.558062               | 0.338819  | -1.522027 |
| 15               | 1                | 0              | -7.958632               | 1.878089  | -1.195024 |
| 16               | 6                | 0              | -9.484492               | -1.085662 | -1.606308 |
| 17               | 1                | 0              | -7.734129               | -2.479725 | -1.455494 |
| 18               | 1                | 0              | -10.461790              | 0.930493  | -1.568949 |
| 19               | 1                | 0              | -10.322653              | -1.757769 | -1.727469 |
| 20               | 26               | 0              | -8.746652               | -0.440030 | 0.233957  |
| 21               | 6                | 0              | -7.756352               | -0.456442 | 2.060616  |
| 22               | 6                | 0              | -8.492726               | -1.667714 | 1.891275  |

|    |    |   |            |           |           |
|----|----|---|------------|-----------|-----------|
| 23 | 6  | 0 | -8.678120  | 0.632106  | 2.012829  |
| 24 | 1  | 0 | -6.681846  | -0.373507 | 2.149820  |
| 25 | 6  | 0 | -9.871941  | -1.327387 | 1.741075  |
| 26 | 1  | 0 | -8.075726  | -2.664513 | 1.851973  |
| 27 | 6  | 0 | -9.986325  | 0.093546  | 1.816086  |
| 28 | 1  | 0 | -8.425547  | 1.681254  | 2.080866  |
| 29 | 1  | 0 | -10.682845 | -2.021467 | 1.567466  |
| 30 | 1  | 0 | -10.898837 | 0.663745  | 1.708703  |
| 31 | 7  | 0 | -3.286434  | 2.373847  | -0.427964 |
| 32 | 7  | 0 | -0.788791  | 2.495610  | -0.114717 |
| 33 | 16 | 0 | -2.107304  | 3.476749  | -0.124624 |
| 34 | 6  | 0 | 0.970160   | 0.133041  | -0.249750 |
| 35 | 6  | 0 | 2.175266   | 0.209707  | -0.086538 |
| 36 | 6  | 0 | 3.572881   | 0.340509  | 0.111337  |
| 37 | 6  | 0 | 4.443392   | -0.803781 | 0.033640  |
| 38 | 6  | 0 | 4.115090   | 1.598697  | 0.386191  |
| 39 | 6  | 0 | 3.973086   | -2.111286 | -0.242157 |
| 40 | 6  | 0 | 5.842104   | -0.612465 | 0.243630  |
| 41 | 6  | 0 | 5.492277   | 1.765310  | 0.588788  |
| 42 | 1  | 0 | 3.449975   | 2.453619  | 0.441544  |
| 43 | 6  | 0 | 4.846697   | -3.179109 | -0.309538 |
| 44 | 1  | 0 | 2.909570   | -2.257879 | -0.400469 |
| 45 | 6  | 0 | 6.720818   | -1.723848 | 0.169135  |
| 46 | 6  | 0 | 6.352352   | 0.680585  | 0.521937  |
| 47 | 1  | 0 | 5.909523   | 2.743596  | 0.801758  |
| 48 | 6  | 0 | 6.227337   | -2.987253 | -0.104845 |
| 49 | 1  | 0 | 4.469520   | -4.174566 | -0.522431 |
| 50 | 1  | 0 | 6.926134   | -3.815279 | -0.156406 |
| 51 | 6  | 0 | 8.179681   | -1.545638 | 0.381580  |
| 52 | 6  | 0 | 7.803662   | 0.888811  | 0.742252  |
| 53 | 8  | 0 | 8.972288   | -2.476348 | 0.306570  |
| 54 | 8  | 0 | 8.281881   | 1.993330  | 0.970858  |
| 55 | 6  | 0 | 10.069211  | -0.058094 | 0.903531  |
| 56 | 1  | 0 | 10.173154  | 0.763070  | 1.614146  |
| 57 | 1  | 0 | 10.443795  | -0.979936 | 1.350574  |
| 58 | 6  | 0 | 10.828424  | 0.255689  | -0.390175 |
| 59 | 1  | 0 | 10.674436  | -0.565830 | -1.100418 |
| 60 | 1  | 0 | 10.404564  | 1.161849  | -0.839633 |
| 61 | 6  | 0 | 12.329371  | 0.453493  | -0.144378 |
| 62 | 1  | 0 | 12.744449  | -0.452271 | 0.317918  |
| 63 | 1  | 0 | 12.474580  | 1.263329  | 0.583396  |
| 64 | 6  | 0 | 13.105018  | 0.774481  | -1.425927 |
| 65 | 1  | 0 | 14.172110  | 0.911862  | -1.223019 |
| 66 | 1  | 0 | 13.006721  | -0.032738 | -2.160536 |
| 67 | 1  | 0 | 12.733404  | 1.693636  | -1.892671 |
| 68 | 7  | 0 | 8.623522   | -0.248914 | 0.681525  |

-----  
HF=-2223.1724646 Hartree

**BTD5**

Standard orientation:

| Center<br>Number | Atomic<br>Number | Atomic<br>Type | Coordinates (Angstroms) |           |           |
|------------------|------------------|----------------|-------------------------|-----------|-----------|
|                  |                  |                | X                       | Y         | Z         |
| 1                | 6                | 0              | 3.998998                | -0.981921 | -1.213982 |
| 2                | 6                | 0              | 4.946437                | -0.861995 | -0.055075 |
| 3                | 6                | 0              | 4.518524                | -1.144564 | -2.476024 |
| 4                | 6                | 0              | 5.692235                | -1.960897 | 0.299648  |
| 5                | 6                | 0              | 5.930335                | -1.093605 | -2.727697 |
| 6                | 6                | 0              | 3.724436                | -1.366671 | -3.649446 |
| 7                | 6                | 0              | 5.516187                | -3.237189 | -0.326309 |
| 8                | 6                | 0              | 6.668502                | -1.940572 | 1.344750  |
| 9                | 7                | 0              | 7.065801                | -1.026152 | -2.971689 |
| 10               | 7                | 0              | 3.122387                | -1.546476 | -4.628689 |
| 11               | 7                | 0              | 5.388430                | -4.289308 | -0.806585 |
| 12               | 7                | 0              | 7.477823                | -1.949132 | 2.181361  |
| 13               | 6                | 0              | 4.941190                | 0.425076  | 0.627858  |
| 14               | 6                | 0              | 4.485228                | 1.664966  | 0.038893  |
| 15               | 6                | 0              | 5.325037                | 0.725769  | 1.990280  |
| 16               | 6                | 0              | 4.564223                | 2.683339  | 1.022717  |
| 17               | 1                | 0              | 4.159171                | 1.795872  | -0.982729 |
| 18               | 6                | 0              | 5.073086                | 2.102292  | 2.224159  |
| 19               | 1                | 0              | 5.721192                | 0.025504  | 2.708735  |
| 20               | 1                | 0              | 4.318557                | 3.725629  | 0.875015  |
| 21               | 1                | 0              | 5.273556                | 2.627026  | 3.147927  |
| 22               | 1                | 0              | 8.181208                | 0.291111  | -0.952423 |
| 23               | 6                | 0              | 8.128641                | 1.219805  | -0.401229 |
| 24               | 6                | 0              | 8.465649                | 1.409239  | 0.972348  |
| 25               | 6                | 0              | 7.655422                | 2.462134  | -0.918544 |
| 26               | 6                | 0              | 8.206983                | 2.774409  | 1.302469  |
| 27               | 1                | 0              | 8.812060                | 0.641345  | 1.649916  |
| 28               | 6                | 0              | 7.704221                | 3.425095  | 0.135129  |
| 29               | 1                | 0              | 7.302248                | 2.634780  | -1.925694 |
| 30               | 1                | 0              | 8.330307                | 3.226271  | 2.277203  |
| 31               | 1                | 0              | 7.386301                | 4.456730  | 0.070002  |
| 32               | 26               | 0              | 6.454635                | 1.858166  | 0.674873  |
| 33               | 6                | 0              | 2.557028                | -0.861051 | -0.949718 |
| 34               | 6                | 0              | 1.958675                | -1.407830 | 0.241518  |
| 35               | 6                | 0              | 1.698379                | -0.189920 | -1.811515 |
| 36               | 6                | 0              | 0.536419                | -1.263915 | 0.487089  |
| 37               | 6                | 0              | 0.313551                | -0.038865 | -1.571259 |
| 38               | 1                | 0              | 2.097787                | 0.270586  | -2.707158 |
| 39               | 6                | 0              | -0.307866               | -0.557767 | -0.442137 |
| 40               | 1                | 0              | -0.280996               | 0.509221  | -2.293634 |

|    |    |   |            |           |           |
|----|----|---|------------|-----------|-----------|
| 41 | 6  | 0 | -1.688078  | -0.406999 | -0.190361 |
| 42 | 6  | 0 | -2.875721  | -0.288013 | 0.054020  |
| 43 | 6  | 0 | -4.251074  | -0.170319 | 0.378170  |
| 44 | 6  | 0 | -5.150820  | 0.573364  | -0.463426 |
| 45 | 6  | 0 | -4.734418  | -0.784548 | 1.536006  |
| 46 | 6  | 0 | -4.738655  | 1.225000  | -1.651876 |
| 47 | 6  | 0 | -6.522469  | 0.659725  | -0.078868 |
| 48 | 6  | 0 | -6.086766  | -0.688176 | 1.894865  |
| 49 | 1  | 0 | -4.044524  | -1.342031 | 2.160206  |
| 50 | 6  | 0 | -5.643489  | 1.929198  | -2.421661 |
| 51 | 1  | 0 | -3.696616  | 1.160803  | -1.947655 |
| 52 | 6  | 0 | -7.434079  | 1.388509  | -0.884851 |
| 53 | 6  | 0 | -6.974152  | 0.022984  | 1.103883  |
| 54 | 1  | 0 | -6.460971  | -1.164701 | 2.794349  |
| 55 | 6  | 0 | -6.997407  | 2.013342  | -2.039268 |
| 56 | 1  | 0 | -5.312254  | 2.422479  | -3.330096 |
| 57 | 1  | 0 | -7.718334  | 2.562862  | -2.634808 |
| 58 | 6  | 0 | -8.867231  | 1.491157  | -0.503295 |
| 59 | 6  | 0 | -8.399776  | 0.112165  | 1.512643  |
| 60 | 7  | 0 | -9.260316  | 0.833608  | 0.674344  |
| 61 | 6  | 0 | -10.675523 | 0.935651  | 1.092919  |
| 62 | 1  | 0 | -11.078496 | 1.814547  | 0.589725  |
| 63 | 1  | 0 | -10.672596 | 1.102158  | 2.171658  |
| 64 | 6  | 0 | -11.506982 | -0.311783 | 0.765328  |
| 65 | 1  | 0 | -12.506974 | -0.146146 | 1.189184  |
| 66 | 1  | 0 | -11.085179 | -1.169619 | 1.301620  |
| 67 | 6  | 0 | -11.636159 | -0.633037 | -0.729010 |
| 68 | 1  | 0 | -10.640257 | -0.813333 | -1.152965 |
| 69 | 1  | 0 | -12.035052 | 0.240262  | -1.259275 |
| 70 | 6  | 0 | -12.524384 | -1.853695 | -0.990794 |
| 71 | 1  | 0 | -12.595927 | -2.072325 | -2.061140 |
| 72 | 1  | 0 | -12.128864 | -2.747121 | -0.494061 |
| 73 | 1  | 0 | -13.541776 | -1.692513 | -0.616102 |
| 74 | 8  | 0 | -8.817686  | -0.415151 | 2.535711  |
| 75 | 8  | 0 | -9.674513  | 2.117197  | -1.176833 |
| 76 | 16 | 0 | 1.451542   | -2.507395 | 2.309875  |
| 77 | 7  | 0 | 2.587485   | -2.095305 | 1.199675  |
| 78 | 7  | 0 | 0.124505   | -1.837107 | 1.619640  |

-----  
HF=-2670.7436779 Hartree

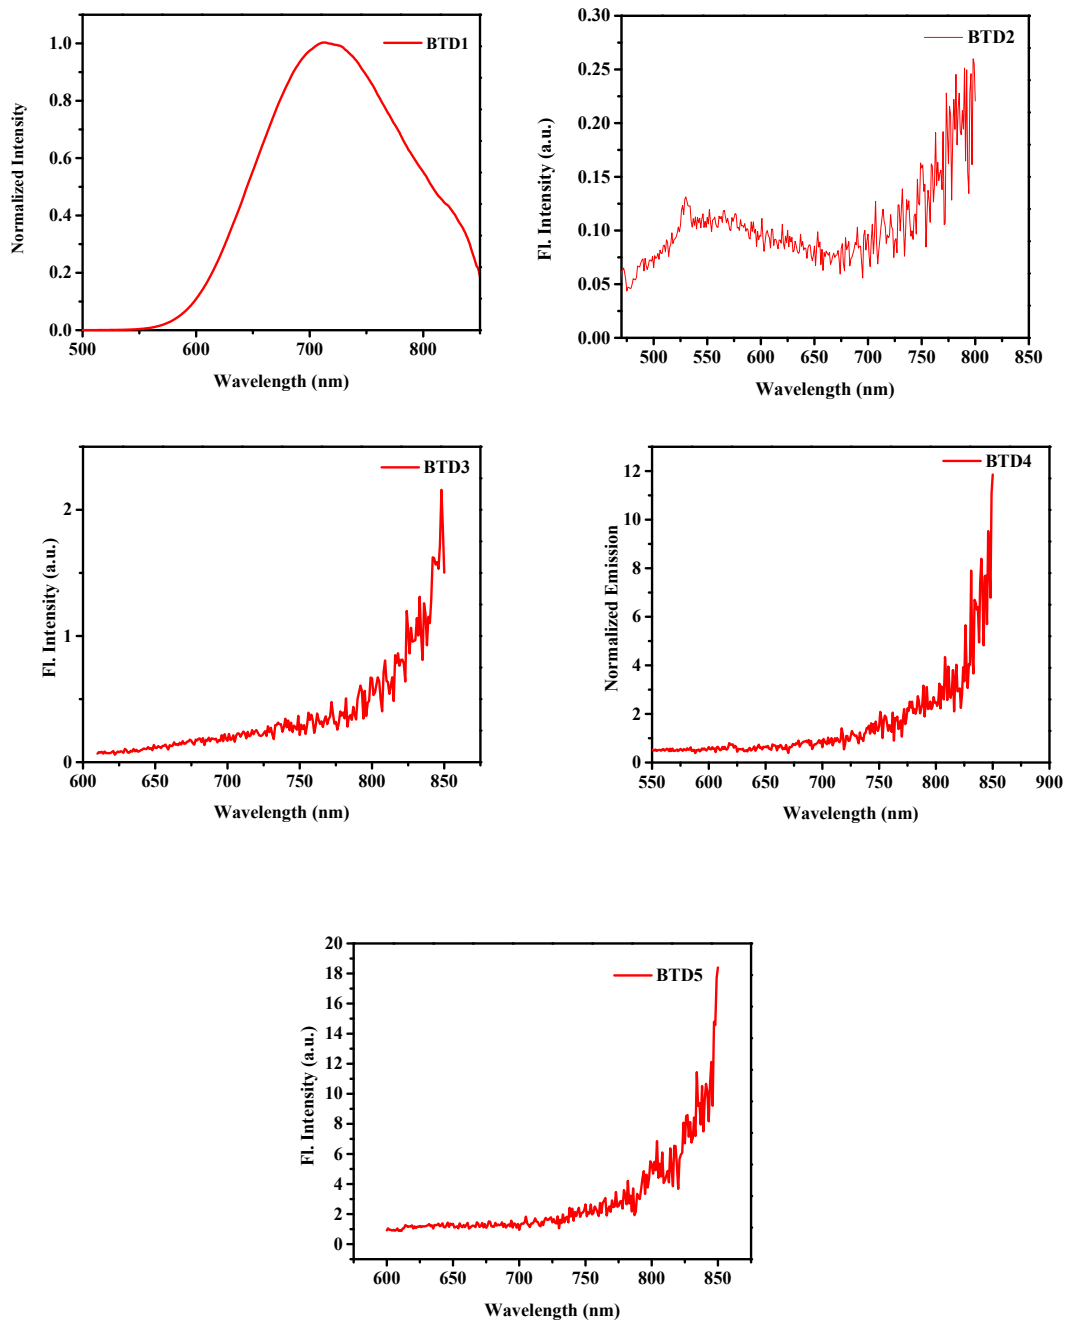

**Figure S13:** Fluorescence spectra of **BTD1–5** in DCM.
